# Supplementary material for: Video-based augmented reality combining CT-scan and instrument position data to microscope view in middle ear surgery
Source: Springer Nature journal article supplement (doi:10.1038/s41598-020-63839-2), 2020-04-21
Supplement: 41598_2020_63839_MOESM2_ESM.pdf [file 41598_2020_63839_MOESM2_ESM.pdf]

**Video-based augmented reality combining CT-scan and instrument position data to  
microscope view in middle ear surgery**

Raabid Hussain, Alain Lalande, Roberto Marroquin, Caroline Guigou, Alexis Bozorg-Grayeli

**Supplementary Information File**

## **List of Supplemental Content**

Supplemental Video S1: A video that demonstrates different processes of the proposed system.
